# Supplementary material for: Network Pharmacology Deciphering Mechanisms of Volatiles of Wendan Granule for the Treatment of Alzheimer's Disease
Source: Evid Based Complement Alternat Med. 2019 Feb 12;2019:7826769. doi: 10.1155/2019/7826769 (PMC6390244; doi:10.1155/2019/7826769)
Supplement: Supplementary Materials — The detailed information of the 12 volatile compounds (S1), compound-target analysis data (S2), and Gene Ontology enrichment analysis results (S3) used to support the findings of this study is included within the supplementary information files. [file 7826769.f1.zip › 7826769.f1/Hindawi_eCAM_Jun-feng Liu-Supplementary Information_S1.xlsx]

## Sheet: 靶点-成分
靶点	成分
Gamma-aminobutyric acid receptor subunit alpha-1	gamma-细辛醚
Gamma-aminobutyric acid receptor subunit alpha-1	T-Muurolol
Gamma-aminobutyric acid receptor subunit alpha-1	β-细辛醚
Gamma-aminobutyric acid receptor subunit alpha-1	丁基酞内酯
Gamma-aminobutyric acid receptor subunit alpha-1	丁烯基苯酞
Gamma-aminobutyric acid receptor subunit alpha-1	反式蒿本内酯
Gamma-aminobutyric acid receptor subunit alpha-1	芳樟醇
Gamma-aminobutyric acid receptor subunit alpha-1	新蛇床内酯
Gamma-aminobutyric acid receptor subunit alpha-1	洋川芎内酯A
Gamma-aminobutyric acid receptor subunit alpha-1	异菖蒲烯二醇
Prostaglandin G/H synthase 2	gamma-细辛醚
Prostaglandin G/H synthase 2	β-细辛醚
Prostaglandin G/H synthase 2	百里香酚
Prostaglandin G/H synthase 2	丁基酞内酯
Prostaglandin G/H synthase 2	丁烯基苯酞
Prostaglandin G/H synthase 2	丁香酚甲醚
Prostaglandin G/H synthase 2	反式蒿本内酯
Prostaglandin G/H synthase 2	芳樟醇
Prostaglandin G/H synthase 2	新蛇床内酯
Prostaglandin G/H synthase 2	洋川芎内酯A
Sodium-dependent noradrenaline transporter	gamma-细辛醚
Sodium-dependent noradrenaline transporter	T-Muurolol
Sodium-dependent noradrenaline transporter	β-细辛醚
Sodium-dependent noradrenaline transporter	百里香酚
Sodium-dependent noradrenaline transporter	丁基酞内酯
Sodium-dependent noradrenaline transporter	丁烯基苯酞
Sodium-dependent noradrenaline transporter	丁香酚甲醚
Sodium-dependent noradrenaline transporter	芳樟醇
Sodium-dependent noradrenaline transporter	新蛇床内酯
Sodium-dependent noradrenaline transporter	洋川芎内酯A
Muscarinic acetylcholine receptor M1	gamma-细辛醚
Muscarinic acetylcholine receptor M1	T-Muurolol
Muscarinic acetylcholine receptor M1	β-细辛醚
Muscarinic acetylcholine receptor M1	百里香酚
Muscarinic acetylcholine receptor M1	丁基酞内酯
Muscarinic acetylcholine receptor M1	丁烯基苯酞
Muscarinic acetylcholine receptor M1	丁香酚甲醚
Muscarinic acetylcholine receptor M1	芳樟醇
Muscarinic acetylcholine receptor M1	异菖蒲烯二醇
Alpha-1B adrenergic receptor	gamma-细辛醚
Alpha-1B adrenergic receptor	T-Muurolol
Alpha-1B adrenergic receptor	β-细辛醚
Alpha-1B adrenergic receptor	百里香酚
Alpha-1B adrenergic receptor	丁基酞内酯
Alpha-1B adrenergic receptor	丁烯基苯酞
Alpha-1B adrenergic receptor	丁香酚甲醚
Alpha-1B adrenergic receptor	芳樟醇
Muscarinic acetylcholine receptor M2	gamma-细辛醚
Muscarinic acetylcholine receptor M2	β-细辛醚
Muscarinic acetylcholine receptor M2	百里香酚
Muscarinic acetylcholine receptor M2	丁基酞内酯
Muscarinic acetylcholine receptor M2	丁烯基苯酞
Muscarinic acetylcholine receptor M2	丁香酚甲醚
Muscarinic acetylcholine receptor M2	芳樟醇
Muscarinic acetylcholine receptor M2	异菖蒲烯二醇
Muscarinic acetylcholine receptor M3	gamma-细辛醚
Muscarinic acetylcholine receptor M3	T-Muurolol
Muscarinic acetylcholine receptor M3	β-细辛醚
Muscarinic acetylcholine receptor M3	百里香酚
Muscarinic acetylcholine receptor M3	丁基酞内酯
Muscarinic acetylcholine receptor M3	丁烯基苯酞
Muscarinic acetylcholine receptor M3	丁香酚甲醚
Muscarinic acetylcholine receptor M3	芳樟醇
Alpha-1A adrenergic receptor	gamma-细辛醚
Alpha-1A adrenergic receptor	β-细辛醚
Alpha-1A adrenergic receptor	百里香酚
Alpha-1A adrenergic receptor	丁基酞内酯
Alpha-1A adrenergic receptor	丁烯基苯酞
Alpha-1A adrenergic receptor	丁香酚甲醚
Alpha-1A adrenergic receptor	芳樟醇
Beta-1 adrenergic receptor	gamma-细辛醚
Beta-1 adrenergic receptor	β-细辛醚
Beta-1 adrenergic receptor	百里香酚
Beta-1 adrenergic receptor	丁基酞内酯
Beta-1 adrenergic receptor	丁烯基苯酞
Beta-1 adrenergic receptor	丁香酚甲醚
Beta-1 adrenergic receptor	芳樟醇
Beta-2 adrenergic receptor	gamma-细辛醚
Beta-2 adrenergic receptor	β-细辛醚
Beta-2 adrenergic receptor	百里香酚
Beta-2 adrenergic receptor	丁基酞内酯
Beta-2 adrenergic receptor	丁烯基苯酞
Beta-2 adrenergic receptor	丁香酚甲醚
Beta-2 adrenergic receptor	芳樟醇
Prostaglandin G/H synthase 1	gamma-细辛醚
Prostaglandin G/H synthase 1	β-细辛醚
Prostaglandin G/H synthase 1	百里香酚
Prostaglandin G/H synthase 1	丁基酞内酯
Prostaglandin G/H synthase 1	丁烯基苯酞
Prostaglandin G/H synthase 1	丁香酚甲醚
Prostaglandin G/H synthase 1	芳樟醇

## Sheet: ADME values of the 12 volatiles
Molecule ID	Molecule Name	Molecule Formula	Molecular Weight	Relative Abundance(%)	OB (%)	BBB	DL	Caco-2	FASA-	TPSA	RBN	HL	AlogP	Hdon	Hacc
MOL002208	Senkyunolide A	C12H16O2	192	7.271	26.56	1.34	0.07	1.3	0.31	26.3	3	NA	3.19	0	2
MOL011782	Trans-ligustilide	C13H18O	190	6.62	23.5	1.2	0.07	1.28	0.32	30.21	2	NA	2.94	0	2
MOL002189	dl-3n-butylphthalide	C12H14O 2	190	6.273	47.9	1.32	0.07	1.3	0.37	26.3	3	5.75	3.25	0	2
MOL002111	Butylidene phthalide	C12H12O2	188	4.138	42.44	1.27	0.07	1.32	0.39	30.21	2	5.64	3	0	2
MOL000207	Methyl eugenol	C11H14O2	178	2.987	73.36	1.41	0.04	1.47	0.27	18.46	4	2.92	2.81	0	2
MOL003537	T-Muurolol	C15H26O	222	3.129	30.41	1.44	0.09	1.36	0.23	20.23	1	7.11	3.78	1	1
MOL008251	Sedanolide	C12H18O2	194	3.522	62.46	1.4	0.07	1.24	0.28	26.3	3	5.05	3.37	0	2
MOL003549	Euasarone	C12H16O3	208	14.658	22.76	1.33	0.06	1.5	0	27.69	5	NA	2.79	0	3
MOL002124	β-Asarone	C12H16O3	208	15.798	35.61	1.24	0.06	1.45	0.15	27.69	4	4.46	2.74	0	3
MOL000920	linalool(D)	C10H18O	154	2.74	38.29	1.33	0.02	1.29	0.32	20.23	4	6.29	2.74	1	1
MOL003560	Isocalamendiol	C15H26O2	238	2.518	57.63	0.74	0.11	0.94	0	40.46	1	7.86	2.69	2	2
MOL002042	Thymol	C10H14O	150	2.125	41.47	1.68	0.03	1.6	0.33	20.23	1	11.33	3.24	1	1
