# Supplementary material for: Network Pharmacology Deciphering Mechanisms of Volatiles of Wendan Granule for the Treatment of Alzheimer's Disease
Source: Evid Based Complement Alternat Med. 2019 Feb 12;2019:7826769. doi: 10.1155/2019/7826769 (PMC6390244; doi:10.1155/2019/7826769)
Supplement: Supplementary Materials — The detailed information of the 12 volatile compounds (S1), compound-target analysis data (S2), and Gene Ontology enrichment analysis results (S3) used to support the findings of this study is included within the supplementary information files. [file 7826769.f1.zip › 7826769.f1/Hindawi_eCAM_Jun-feng Liu-Supplementary Information_S2.xlsx]

## Sheet: 靶点-成分
靶点	成分
Gamma-aminobutyric acid receptor subunit alpha-1	gamma-细辛醚
Gamma-aminobutyric acid receptor subunit alpha-1	T-Muurolol
Gamma-aminobutyric acid receptor subunit alpha-1	β-细辛醚
Gamma-aminobutyric acid receptor subunit alpha-1	丁基酞内酯
Gamma-aminobutyric acid receptor subunit alpha-1	丁烯基苯酞
Gamma-aminobutyric acid receptor subunit alpha-1	反式蒿本内酯
Gamma-aminobutyric acid receptor subunit alpha-1	芳樟醇
Gamma-aminobutyric acid receptor subunit alpha-1	新蛇床内酯
Gamma-aminobutyric acid receptor subunit alpha-1	洋川芎内酯A
Gamma-aminobutyric acid receptor subunit alpha-1	异菖蒲烯二醇
Prostaglandin G/H synthase 2	gamma-细辛醚
Prostaglandin G/H synthase 2	β-细辛醚
Prostaglandin G/H synthase 2	百里香酚
Prostaglandin G/H synthase 2	丁基酞内酯
Prostaglandin G/H synthase 2	丁烯基苯酞
Prostaglandin G/H synthase 2	丁香酚甲醚
Prostaglandin G/H synthase 2	反式蒿本内酯
Prostaglandin G/H synthase 2	芳樟醇
Prostaglandin G/H synthase 2	新蛇床内酯
Prostaglandin G/H synthase 2	洋川芎内酯A
Sodium-dependent noradrenaline transporter	gamma-细辛醚
Sodium-dependent noradrenaline transporter	T-Muurolol
Sodium-dependent noradrenaline transporter	β-细辛醚
Sodium-dependent noradrenaline transporter	百里香酚
Sodium-dependent noradrenaline transporter	丁基酞内酯
Sodium-dependent noradrenaline transporter	丁烯基苯酞
Sodium-dependent noradrenaline transporter	丁香酚甲醚
Sodium-dependent noradrenaline transporter	芳樟醇
Sodium-dependent noradrenaline transporter	新蛇床内酯
Sodium-dependent noradrenaline transporter	洋川芎内酯A
Muscarinic acetylcholine receptor M1	gamma-细辛醚
Muscarinic acetylcholine receptor M1	T-Muurolol
Muscarinic acetylcholine receptor M1	β-细辛醚
Muscarinic acetylcholine receptor M1	百里香酚
Muscarinic acetylcholine receptor M1	丁基酞内酯
Muscarinic acetylcholine receptor M1	丁烯基苯酞
Muscarinic acetylcholine receptor M1	丁香酚甲醚
Muscarinic acetylcholine receptor M1	芳樟醇
Muscarinic acetylcholine receptor M1	异菖蒲烯二醇
Alpha-1B adrenergic receptor	gamma-细辛醚
Alpha-1B adrenergic receptor	T-Muurolol
Alpha-1B adrenergic receptor	β-细辛醚
Alpha-1B adrenergic receptor	百里香酚
Alpha-1B adrenergic receptor	丁基酞内酯
Alpha-1B adrenergic receptor	丁烯基苯酞
Alpha-1B adrenergic receptor	丁香酚甲醚
Alpha-1B adrenergic receptor	芳樟醇
Muscarinic acetylcholine receptor M2	gamma-细辛醚
Muscarinic acetylcholine receptor M2	β-细辛醚
Muscarinic acetylcholine receptor M2	百里香酚
Muscarinic acetylcholine receptor M2	丁基酞内酯
Muscarinic acetylcholine receptor M2	丁烯基苯酞
Muscarinic acetylcholine receptor M2	丁香酚甲醚
Muscarinic acetylcholine receptor M2	芳樟醇
Muscarinic acetylcholine receptor M2	异菖蒲烯二醇
Muscarinic acetylcholine receptor M3	gamma-细辛醚
Muscarinic acetylcholine receptor M3	T-Muurolol
Muscarinic acetylcholine receptor M3	β-细辛醚
Muscarinic acetylcholine receptor M3	百里香酚
Muscarinic acetylcholine receptor M3	丁基酞内酯
Muscarinic acetylcholine receptor M3	丁烯基苯酞
Muscarinic acetylcholine receptor M3	丁香酚甲醚
Muscarinic acetylcholine receptor M3	芳樟醇
Alpha-1A adrenergic receptor	gamma-细辛醚
Alpha-1A adrenergic receptor	β-细辛醚
Alpha-1A adrenergic receptor	百里香酚
Alpha-1A adrenergic receptor	丁基酞内酯
Alpha-1A adrenergic receptor	丁烯基苯酞
Alpha-1A adrenergic receptor	丁香酚甲醚
Alpha-1A adrenergic receptor	芳樟醇
Beta-1 adrenergic receptor	gamma-细辛醚
Beta-1 adrenergic receptor	β-细辛醚
Beta-1 adrenergic receptor	百里香酚
Beta-1 adrenergic receptor	丁基酞内酯
Beta-1 adrenergic receptor	丁烯基苯酞
Beta-1 adrenergic receptor	丁香酚甲醚
Beta-1 adrenergic receptor	芳樟醇
Beta-2 adrenergic receptor	gamma-细辛醚
Beta-2 adrenergic receptor	β-细辛醚
Beta-2 adrenergic receptor	百里香酚
Beta-2 adrenergic receptor	丁基酞内酯
Beta-2 adrenergic receptor	丁烯基苯酞
Beta-2 adrenergic receptor	丁香酚甲醚
Beta-2 adrenergic receptor	芳樟醇
Prostaglandin G/H synthase 1	gamma-细辛醚
Prostaglandin G/H synthase 1	β-细辛醚
Prostaglandin G/H synthase 1	百里香酚
Prostaglandin G/H synthase 1	丁基酞内酯
Prostaglandin G/H synthase 1	丁烯基苯酞
Prostaglandin G/H synthase 1	丁香酚甲醚
Prostaglandin G/H synthase 1	芳樟醇

## Sheet: Compound-target information
Compound	Target
γ-Asarone	Alpha-1A adrenergic receptor
	Alpha-1B adrenergic receptor
	Alpha-1D adrenergic receptor
	Alpha-2A adrenergic receptor
	Alpha-2B adrenergic receptor
	Alpha-2C adrenergic receptor
	Beta-1 adrenergic receptor
	Beta-2 adrenergic receptor
	cAMP-dependent protein kinase inhibitor alpha
	CGMP-inhibited 3',5'-cyclic phosphodiesterase A
	Dopamine D1 receptor
	Gamma-aminobutyric acid receptor subunit alpha-1
	Glutamate receptor 2
	Leukotriene A-4 hydrolase
	Muscarinic acetylcholine receptor M1
	Muscarinic acetylcholine receptor M2
	Muscarinic acetylcholine receptor M3
	Prostaglandin G/H synthase 1
	Prostaglandin G/H synthase 2
	Sodium channel protein type 5 subunit alpha
	Sodium-dependent dopamine transporter
	Sodium-dependent noradrenaline transporter
	Sodium-dependent serotonin transporter
T-Muurolol	Alpha-1B adrenergic receptor
	Gamma-aminobutyric acid receptor subunit alpha-1
	Gamma-aminobutyric-acid receptor alpha-2 subunit
	Gamma-aminobutyric-acid receptor subunit alpha-6
	Muscarinic acetylcholine receptor M1
	Muscarinic acetylcholine receptor M3
	Neuronal acetylcholine receptor protein, alpha-7 chain
	Sodium-dependent noradrenaline transporter
β-Asarone	5-hydroxytryptamine 2A receptor
	Alpha-1A adrenergic receptor
	Alpha-1B adrenergic receptor
	Alpha-2A adrenergic receptor
	Alpha-2B adrenergic receptor
	Alpha-2C adrenergic receptor
	Beta-1 adrenergic receptor
	Beta-2 adrenergic receptor
	cAMP-dependent protein kinase inhibitor alpha
	CGMP-inhibited 3',5'-cyclic phosphodiesterase A
	Dopamine D1 receptor
	Gamma-aminobutyric acid receptor subunit alpha-1
	Glutamate decarboxylase 2
	Leukotriene A-4 hydrolase
	Muscarinic acetylcholine receptor M1
	Muscarinic acetylcholine receptor M2
	Muscarinic acetylcholine receptor M3
	Prostaglandin G/H synthase 1
	Prostaglandin G/H synthase 2
	Proto-oncogene c-Fos N/A
	Sodium channel protein type 5 subunit alpha
	Sodium-dependent dopamine transporter
	Sodium-dependent noradrenaline transporter
	Sodium-dependent serotonin transporter
Thymol	Alpha-1A adrenergic receptor
	Alpha-1B adrenergic receptor
	Alpha-1D adrenergic receptor
	Alpha-2C adrenergic receptor
	Beta-1 adrenergic receptor
	Beta-2 adrenergic receptor
	Gamma-aminobutyric-acid receptor alpha-2 subunit
	Lysozyme
	Muscarinic acetylcholine receptor M1
	Muscarinic acetylcholine receptor M2
	Muscarinic acetylcholine receptor M3
	Neutrophil elastase
	Prostaglandin G/H synthase 1
	Prostaglandin G/H synthase 2
	Sodium-dependent dopamine transporter
dl-3n-butylphthalide	Sodium-dependent noradrenaline transporter
	5-hydroxytryptamine 2A receptor
	Alpha-1A adrenergic receptor
	Alpha-1B adrenergic receptor
	Alpha-1D adrenergic receptor
	Alpha-2A adrenergic receptor
	Alpha-2B adrenergic receptor
	Alpha-2C adrenergic receptor
	Amine oxidase [flavin-containing] A
	Amine oxidase [flavin-containing] B
	Beta-1 adrenergic receptor
	Beta-2 adrenergic receptor
	Beta-lactamase
	cAMP-dependent protein kinase inhibitor alpha
	CGMP-inhibited 3',5'-cyclic phosphodiesterase A
	D(2) dopamine receptor
	Dopamine D1 receptor
	Gamma-aminobutyric acid receptor subunit alpha-1
	Heparin-binding growth factor 2
	mRNA of PKA Catalytic Subunit C-alpha
	Muscarinic acetylcholine receptor M1
	Muscarinic acetylcholine receptor M2
	Muscarinic acetylcholine receptor M3
	Neuronal acetylcholine receptor subunit alpha-2
	Prostaglandin G/H synthase 1
	Prostaglandin G/H synthase 2
	Retinoic acid receptor RXR-alpha
	Sodium channel protein type 10 subunit alpha
	Sodium channel protein type 5 subunit alpha
	Sodium-dependent dopamine transporter
	Sodium-dependent noradrenaline transporter
	Sodium-dependent serotonin transporter
	Vascular endothelial growth factor A
Butylidene phthalide	5-hydroxytryptamine 2A receptor
	Alpha-1A adrenergic receptor
	Alpha-1B adrenergic receptor
	Alpha-2A adrenergic receptor
	Alpha-2B adrenergic receptor
	Alpha-2C adrenergic receptor
	Amine oxidase [flavin-containing] A
	Amine oxidase [flavin-containing] A
	Beta-1 adrenergic receptor
	Beta-2 adrenergic receptor
	cAMP-dependent protein kinase inhibitor alpha
	CGMP-inhibited 3',5'-cyclic phosphodiesterase A
	Gamma-aminobutyric acid receptor subunit alpha-1
	mRNA of PKA Catalytic Subunit C-alpha
	Muscarinic acetylcholine receptor M1
	Muscarinic acetylcholine receptor M2
	Muscarinic acetylcholine receptor M3
	Prostaglandin G/H synthase 1
	Prostaglandin G/H synthase 2
	Retinoic acid receptor RXR-alpha
	Sodium channel protein type 5 subunit alpha
	Sodium-dependent dopamine transporter
	Sodium-dependent noradrenaline transporter
	Sodium-dependent serotonin transporter
Methyl eugenol	5-hydroxytryptamine 2A receptor
	Alpha-1A adrenergic receptor
	Alpha-1B adrenergic receptor
	Alpha-1D adrenergic receptor
	Alpha-2A adrenergic receptor
	Alpha-2B adrenergic receptor
	Alpha-2C adrenergic receptor
	Amine oxidase [flavin-containing] B
	Beta-1 adrenergic receptor
	Beta-2 adrenergic receptor
	Beta-lactamase
	cAMP-dependent protein kinase inhibitor alpha
	Dopamine D1 receptor
	Leukotriene A-4 hydrolase
	Muscarinic acetylcholine receptor M1
	Muscarinic acetylcholine receptor M2
	Muscarinic acetylcholine receptor M3
	Nitric-oxide synthase, endothelial
	Prostaglandin G/H synthase 1
	Prostaglandin G/H synthase 2
	Sodium channel protein type 5 subunit alpha
	Sodium-dependent dopamine transporter
	Sodium-dependent noradrenaline transporter
	Sodium-dependent serotonin transporter
	Urokinase-type plasminogen activator
Trans-ligustilide	Gamma-aminobutyric acid receptor subunit alpha-1
	Prostaglandin G/H synthase 2
Linalool	Alcohol dehydrogenase 1C
	Alpha-1A adrenergic receptor
	Alpha-1B adrenergic receptor
	Alpha-2A adrenergic receptor
	Amine oxidase [flavin-containing] B
	Beta-1 adrenergic receptor
	Beta-2 adrenergic receptor
	cAMP-dependent protein kinase inhibitor alpha
	Cytochrome P450-cam
	Gamma-aminobutyric acid receptor subunit alpha-1
	Gamma-aminobutyric-acid receptor alpha-2 subunit
	Gamma-aminobutyric-acid receptor alpha-3 subunit
	Gamma-aminobutyric-acid receptor alpha-5 subunit
	Gamma-aminobutyric-acid receptor subunit alpha-6
	Leukotriene A-4 hydrolase
	Lysozyme
	Muscarinic acetylcholine receptor M1
	Muscarinic acetylcholine receptor M2
	Muscarinic acetylcholine receptor M3
	Nicotinate-nucleotide--dimethylbenzimidazole phosphoribosyltransferase
	Prostaglandin G/H synthase 1
	Prostaglandin G/H synthase 2
	Retinoic acid receptor RXR-alpha
	Sodium-dependent dopamine transporter
	Sodium-dependent noradrenaline transporter
	Sodium-dependent serotonin transporter
Sedanolide	Gamma-aminobutyric acid receptor subunit alpha-1
	Gamma-aminobutyric-acid receptor alpha-2 subunit
	Gamma-aminobutyric-acid receptor alpha-3 subunit
	Gamma-aminobutyric-acid receptor alpha-5 subunit
	Gamma-aminobutyric-acid receptor subunit alpha-6
	Glutamate receptor 2
	Prostaglandin G/H synthase 2
	Sodium-dependent noradrenaline transporter
Senkyunolide A	Gamma-aminobutyric acid receptor subunit alpha-1
	Gamma-aminobutyric-acid receptor alpha-2 subunit
	Gamma-aminobutyric-acid receptor alpha-3 subunit
	Gamma-aminobutyric-acid receptor subunit alpha-6
	Glutamate receptor 2
	Nitric-oxide synthase, endothelial
	Prostaglandin G/H synthase 2
	Sodium-dependent noradrenaline transporter
Isocalamendiol	Gamma-aminobutyric acid receptor subunit alpha-1
	Gamma-aminobutyric-acid receptor alpha-2 subunit
	Gamma-aminobutyric-acid receptor subunit alpha-6
	Muscarinic acetylcholine receptor M1
	Muscarinic acetylcholine receptor M2

## Sheet: Compound-target information (2
Compound	Target
γ-Asarone	Alpha-1A adrenergic receptor
	Alpha-1B adrenergic receptor
	Alpha-1D adrenergic receptor
	Alpha-2A adrenergic receptor
	Alpha-2B adrenergic receptor
	Alpha-2C adrenergic receptor
	Beta-1 adrenergic receptor
	Beta-2 adrenergic receptor
	cAMP-dependent protein kinase inhibitor alpha
	CGMP-inhibited 3',5'-cyclic phosphodiesterase A
	Dopamine D1 receptor
	Gamma-aminobutyric acid receptor subunit alpha-1
	Glutamate receptor 2
	Leukotriene A-4 hydrolase
	Muscarinic acetylcholine receptor M1
	Muscarinic acetylcholine receptor M2
	Muscarinic acetylcholine receptor M3
	Prostaglandin G/H synthase 1
	Prostaglandin G/H synthase 2
	Sodium channel protein type 5 subunit alpha
	Sodium-dependent dopamine transporter
	Sodium-dependent noradrenaline transporter
	Sodium-dependent serotonin transporter

## Sheet: Sheet3
Compound	Target
T-Muurolol	Alpha-1B adrenergic receptor
	Gamma-aminobutyric acid receptor subunit alpha-1
	Gamma-aminobutyric-acid receptor alpha-2 subunit
	Gamma-aminobutyric-acid receptor subunit alpha-6
	Muscarinic acetylcholine receptor M1
	Muscarinic acetylcholine receptor M3
	Neuronal acetylcholine receptor protein, alpha-7 chain
	Sodium-dependent noradrenaline transporter
Trans-ligustilide	Gamma-aminobutyric acid receptor subunit alpha-1
	Prostaglandin G/H synthase 2
Thymol	Alpha-1A adrenergic receptor
	Alpha-1B adrenergic receptor
	Alpha-1D adrenergic receptor
	Alpha-2C adrenergic receptor
	Beta-1 adrenergic receptor
	Beta-2 adrenergic receptor
	Gamma-aminobutyric-acid receptor alpha-2 subunit
	Lysozyme
	Muscarinic acetylcholine receptor M1
	Muscarinic acetylcholine receptor M2
	Muscarinic acetylcholine receptor M3
	Neutrophil elastase
	Prostaglandin G/H synthase 1
	Prostaglandin G/H synthase 2
	Sodium-dependent dopamine transporter

## Sheet: Sheet4
Compound	Target
β-Asarone	5-hydroxytryptamine 2A receptor
	Alpha-1A adrenergic receptor
	Alpha-1B adrenergic receptor
	Alpha-2A adrenergic receptor
	Alpha-2B adrenergic receptor
	Alpha-2C adrenergic receptor
	Beta-1 adrenergic receptor
	Beta-2 adrenergic receptor
	cAMP-dependent protein kinase inhibitor alpha
	CGMP-inhibited 3',5'-cyclic phosphodiesterase A
	Dopamine D1 receptor
	Gamma-aminobutyric acid receptor subunit alpha-1
	Glutamate decarboxylase 2
	Leukotriene A-4 hydrolase
	Muscarinic acetylcholine receptor M1
	Muscarinic acetylcholine receptor M2
	Muscarinic acetylcholine receptor M3
	Prostaglandin G/H synthase 1
	Prostaglandin G/H synthase 2
	Proto-oncogene c-Fos N/A
	Sodium channel protein type 5 subunit alpha
	Sodium-dependent dopamine transporter
	Sodium-dependent noradrenaline transporter
	Sodium-dependent serotonin transporter

## Sheet: Sheet6
Compound	Target
dl-3n-butylphthalide	Sodium-dependent noradrenaline transporter
	5-hydroxytryptamine 2A receptor
	Alpha-1A adrenergic receptor
	Alpha-1B adrenergic receptor
	Alpha-1D adrenergic receptor
	Alpha-2A adrenergic receptor
	Alpha-2B adrenergic receptor
	Alpha-2C adrenergic receptor
	Amine oxidase [flavin-containing] A
	Amine oxidase [flavin-containing] B
	Beta-1 adrenergic receptor
	Beta-2 adrenergic receptor
	Beta-lactamase
	cAMP-dependent protein kinase inhibitor alpha
	CGMP-inhibited 3',5'-cyclic phosphodiesterase A
	D(2) dopamine receptor
	Dopamine D1 receptor
	Gamma-aminobutyric acid receptor subunit alpha-1
	Heparin-binding growth factor 2
	mRNA of PKA Catalytic Subunit C-alpha
	Muscarinic acetylcholine receptor M1
	Muscarinic acetylcholine receptor M2
	Muscarinic acetylcholine receptor M3
	Neuronal acetylcholine receptor subunit alpha-2
	Prostaglandin G/H synthase 1
	Prostaglandin G/H synthase 2
	Retinoic acid receptor RXR-alpha
	Sodium channel protein type 10 subunit alpha
	Sodium channel protein type 5 subunit alpha
	Sodium-dependent dopamine transporter
	Sodium-dependent noradrenaline transporter
	Sodium-dependent serotonin transporter
	Vascular endothelial growth factor A

## Sheet: Sheet7
Compound	Target
Butylidene phthalide	5-hydroxytryptamine 2A receptor
	Alpha-1A adrenergic receptor
	Alpha-1B adrenergic receptor
	Alpha-2A adrenergic receptor
	Alpha-2B adrenergic receptor
	Alpha-2C adrenergic receptor
	Amine oxidase [flavin-containing] A
	Amine oxidase [flavin-containing] A
	Beta-1 adrenergic receptor
	Beta-2 adrenergic receptor
	cAMP-dependent protein kinase inhibitor alpha
	CGMP-inhibited 3',5'-cyclic phosphodiesterase A
	Gamma-aminobutyric acid receptor subunit alpha-1
	mRNA of PKA Catalytic Subunit C-alpha
	Muscarinic acetylcholine receptor M1
	Muscarinic acetylcholine receptor M2
	Muscarinic acetylcholine receptor M3
	Prostaglandin G/H synthase 1
	Prostaglandin G/H synthase 2
	Retinoic acid receptor RXR-alpha
	Sodium channel protein type 5 subunit alpha
	Sodium-dependent dopamine transporter
	Sodium-dependent noradrenaline transporter
	Sodium-dependent serotonin transporter

## Sheet: Sheet8
Compound	Target
Methyl eugenol	5-hydroxytryptamine 2A receptor
	Alpha-1A adrenergic receptor
	Alpha-1B adrenergic receptor
	Alpha-1D adrenergic receptor
	Alpha-2A adrenergic receptor
	Alpha-2B adrenergic receptor
	Alpha-2C adrenergic receptor
	Amine oxidase [flavin-containing] B
	Beta-1 adrenergic receptor
	Beta-2 adrenergic receptor
	Beta-lactamase
	cAMP-dependent protein kinase inhibitor alpha
	Dopamine D1 receptor
	Leukotriene A-4 hydrolase
	Muscarinic acetylcholine receptor M1
	Muscarinic acetylcholine receptor M2
	Muscarinic acetylcholine receptor M3
	Nitric-oxide synthase, endothelial
	Prostaglandin G/H synthase 1
	Prostaglandin G/H synthase 2
	Sodium channel protein type 5 subunit alpha
	Sodium-dependent dopamine transporter
	Sodium-dependent noradrenaline transporter
	Sodium-dependent serotonin transporter
	Urokinase-type plasminogen activator

## Sheet: Sheet9
Compound	Target
Linalool	Alcohol dehydrogenase 1C
	Alpha-1A adrenergic receptor
	Alpha-1B adrenergic receptor
	Alpha-2A adrenergic receptor
	Amine oxidase [flavin-containing] B
	Beta-1 adrenergic receptor
	Beta-2 adrenergic receptor
	cAMP-dependent protein kinase inhibitor alpha
	Cytochrome P450-cam
	Gamma-aminobutyric acid receptor subunit alpha-1
	Gamma-aminobutyric-acid receptor alpha-2 subunit
	Gamma-aminobutyric-acid receptor alpha-3 subunit
	Gamma-aminobutyric-acid receptor alpha-5 subunit
	Gamma-aminobutyric-acid receptor subunit alpha-6
	Leukotriene A-4 hydrolase
	Lysozyme
	Muscarinic acetylcholine receptor M1
	Muscarinic acetylcholine receptor M2
	Muscarinic acetylcholine receptor M3
	Nicotinate-nucleotide--dimethylbenzimidazole phosphoribosyltransferase
	Prostaglandin G/H synthase 1
	Prostaglandin G/H synthase 2
	Retinoic acid receptor RXR-alpha
	Sodium-dependent dopamine transporter
	Sodium-dependent noradrenaline transporter
	Sodium-dependent serotonin transporter

## Sheet: Sheet10
Compound	Target
Sedanolide	Gamma-aminobutyric acid receptor subunit alpha-1
	Gamma-aminobutyric-acid receptor alpha-2 subunit
	Gamma-aminobutyric-acid receptor alpha-3 subunit
	Gamma-aminobutyric-acid receptor alpha-5 subunit
	Gamma-aminobutyric-acid receptor subunit alpha-6
	Glutamate receptor 2
	Prostaglandin G/H synthase 2
	Sodium-dependent noradrenaline transporter
Senkyunolide A	Gamma-aminobutyric acid receptor subunit alpha-1
	Gamma-aminobutyric-acid receptor alpha-2 subunit
	Gamma-aminobutyric-acid receptor alpha-3 subunit
	Gamma-aminobutyric-acid receptor subunit alpha-6
	Glutamate receptor 2
	Nitric-oxide synthase, endothelial
	Prostaglandin G/H synthase 2
	Sodium-dependent noradrenaline transporter
Isocalamendiol	Gamma-aminobutyric acid receptor subunit alpha-1
	Gamma-aminobutyric-acid receptor alpha-2 subunit
	Gamma-aminobutyric-acid receptor subunit alpha-6
	Muscarinic acetylcholine receptor M1
	Muscarinic acetylcholine receptor M2
