# Supplementary material for: Network Pharmacology Deciphering Mechanisms of Volatiles of Wendan Granule for the Treatment of Alzheimer's Disease
Source: Evid Based Complement Alternat Med. 2019 Feb 12;2019:7826769. doi: 10.1155/2019/7826769 (PMC6390244; doi:10.1155/2019/7826769)
Supplement: Supplementary Materials — The detailed information of the 12 volatile compounds (S1), compound-target analysis data (S2), and Gene Ontology enrichment analysis results (S3) used to support the findings of this study is included within the supplementary information files. [file 7826769.f1.zip › 7826769.f1/Hindawi_eCAM_Jun-feng Liu-Supplementary Information_S3.xlsx]

## Sheet: 靶点-成分
靶点	成分
Gamma-aminobutyric acid receptor subunit alpha-1	gamma-细辛醚
Gamma-aminobutyric acid receptor subunit alpha-1	T-Muurolol
Gamma-aminobutyric acid receptor subunit alpha-1	β-细辛醚
Gamma-aminobutyric acid receptor subunit alpha-1	丁基酞内酯
Gamma-aminobutyric acid receptor subunit alpha-1	丁烯基苯酞
Gamma-aminobutyric acid receptor subunit alpha-1	反式蒿本内酯
Gamma-aminobutyric acid receptor subunit alpha-1	芳樟醇
Gamma-aminobutyric acid receptor subunit alpha-1	新蛇床内酯
Gamma-aminobutyric acid receptor subunit alpha-1	洋川芎内酯A
Gamma-aminobutyric acid receptor subunit alpha-1	异菖蒲烯二醇
Prostaglandin G/H synthase 2	gamma-细辛醚
Prostaglandin G/H synthase 2	β-细辛醚
Prostaglandin G/H synthase 2	百里香酚
Prostaglandin G/H synthase 2	丁基酞内酯
Prostaglandin G/H synthase 2	丁烯基苯酞
Prostaglandin G/H synthase 2	丁香酚甲醚
Prostaglandin G/H synthase 2	反式蒿本内酯
Prostaglandin G/H synthase 2	芳樟醇
Prostaglandin G/H synthase 2	新蛇床内酯
Prostaglandin G/H synthase 2	洋川芎内酯A
Sodium-dependent noradrenaline transporter	gamma-细辛醚
Sodium-dependent noradrenaline transporter	T-Muurolol
Sodium-dependent noradrenaline transporter	β-细辛醚
Sodium-dependent noradrenaline transporter	百里香酚
Sodium-dependent noradrenaline transporter	丁基酞内酯
Sodium-dependent noradrenaline transporter	丁烯基苯酞
Sodium-dependent noradrenaline transporter	丁香酚甲醚
Sodium-dependent noradrenaline transporter	芳樟醇
Sodium-dependent noradrenaline transporter	新蛇床内酯
Sodium-dependent noradrenaline transporter	洋川芎内酯A
Muscarinic acetylcholine receptor M1	gamma-细辛醚
Muscarinic acetylcholine receptor M1	T-Muurolol
Muscarinic acetylcholine receptor M1	β-细辛醚
Muscarinic acetylcholine receptor M1	百里香酚
Muscarinic acetylcholine receptor M1	丁基酞内酯
Muscarinic acetylcholine receptor M1	丁烯基苯酞
Muscarinic acetylcholine receptor M1	丁香酚甲醚
Muscarinic acetylcholine receptor M1	芳樟醇
Muscarinic acetylcholine receptor M1	异菖蒲烯二醇
Alpha-1B adrenergic receptor	gamma-细辛醚
Alpha-1B adrenergic receptor	T-Muurolol
Alpha-1B adrenergic receptor	β-细辛醚
Alpha-1B adrenergic receptor	百里香酚
Alpha-1B adrenergic receptor	丁基酞内酯
Alpha-1B adrenergic receptor	丁烯基苯酞
Alpha-1B adrenergic receptor	丁香酚甲醚
Alpha-1B adrenergic receptor	芳樟醇
Muscarinic acetylcholine receptor M2	gamma-细辛醚
Muscarinic acetylcholine receptor M2	β-细辛醚
Muscarinic acetylcholine receptor M2	百里香酚
Muscarinic acetylcholine receptor M2	丁基酞内酯
Muscarinic acetylcholine receptor M2	丁烯基苯酞
Muscarinic acetylcholine receptor M2	丁香酚甲醚
Muscarinic acetylcholine receptor M2	芳樟醇
Muscarinic acetylcholine receptor M2	异菖蒲烯二醇
Muscarinic acetylcholine receptor M3	gamma-细辛醚
Muscarinic acetylcholine receptor M3	T-Muurolol
Muscarinic acetylcholine receptor M3	β-细辛醚
Muscarinic acetylcholine receptor M3	百里香酚
Muscarinic acetylcholine receptor M3	丁基酞内酯
Muscarinic acetylcholine receptor M3	丁烯基苯酞
Muscarinic acetylcholine receptor M3	丁香酚甲醚
Muscarinic acetylcholine receptor M3	芳樟醇
Alpha-1A adrenergic receptor	gamma-细辛醚
Alpha-1A adrenergic receptor	β-细辛醚
Alpha-1A adrenergic receptor	百里香酚
Alpha-1A adrenergic receptor	丁基酞内酯
Alpha-1A adrenergic receptor	丁烯基苯酞
Alpha-1A adrenergic receptor	丁香酚甲醚
Alpha-1A adrenergic receptor	芳樟醇
Beta-1 adrenergic receptor	gamma-细辛醚
Beta-1 adrenergic receptor	β-细辛醚
Beta-1 adrenergic receptor	百里香酚
Beta-1 adrenergic receptor	丁基酞内酯
Beta-1 adrenergic receptor	丁烯基苯酞
Beta-1 adrenergic receptor	丁香酚甲醚
Beta-1 adrenergic receptor	芳樟醇
Beta-2 adrenergic receptor	gamma-细辛醚
Beta-2 adrenergic receptor	β-细辛醚
Beta-2 adrenergic receptor	百里香酚
Beta-2 adrenergic receptor	丁基酞内酯
Beta-2 adrenergic receptor	丁烯基苯酞
Beta-2 adrenergic receptor	丁香酚甲醚
Beta-2 adrenergic receptor	芳樟醇
Prostaglandin G/H synthase 1	gamma-细辛醚
Prostaglandin G/H synthase 1	β-细辛醚
Prostaglandin G/H synthase 1	百里香酚
Prostaglandin G/H synthase 1	丁基酞内酯
Prostaglandin G/H synthase 1	丁烯基苯酞
Prostaglandin G/H synthase 1	丁香酚甲醚
Prostaglandin G/H synthase 1	芳樟醇

## Sheet: GO enrichment analysis
Category	Term	Count	%	P-Value	Benjamini
GOTERM_CC_DIRECT	plasma membrane	23	0.5	1.7e-09	5.9e-08
GOTERM_CC_DIRECT	integral component of plasma membrane	20	0.4	6.9e-15	4.7e-13
GOTERM_CC_DIRECT	integral component of membrane	16	0.3	0.0066	0.034
GOTERM_CC_DIRECT	postsynaptic membrane	8	0.2	3.2e-08	7.3e-07
GOTERM_CC_DIRECT	cell junction	8	0.2	5.9e-06	8.2e-05
GOTERM_CC_DIRECT	synapse	6	0.1	8.9e-06	0.0001
GOTERM_CC_DIRECT	dendrite	5	0.1	0.0019	0.013
GOTERM_CC_DIRECT	GABA-A receptor complex	4	0.1	2.9e-06	5e-05
GOTERM_CC_DIRECT	axon terminus	4	0.1	6e-05	0.00059
GOTERM_CC_DIRECT	chloride channel complex	4	0.1	6.4e-05	0.00055
GOTERM_CC_DIRECT	neuron projection	4	0.1	0.0062	0.035
GOTERM_CC_DIRECT	neuronal cell body	4	0.1	0.013	0.064
Category	Term	Count	%	P-Value	Benjamini
GOTERM_BP_DIRECT	response to drug	9	0.2	3.2e-08	3.1e-06
GOTERM_BP_DIRECT	G-protein coupled receptor signaling pathway	9	0.2	0.0001	0.0028
GOTERM_BP_DIRECT	adenylate cyclase-activating adrenergic receptor signaling pathway	8	0.2	1e-15	3.8e-13
GOTERM_BP_DIRECT	cell-cell signaling	7	0.1	4e-06	0.00025
GOTERM_BP_DIRECT	positive regulation of vasoconstriction	6	0.1	2.1e-09	3.9e-07
GOTERM_BP_DIRECT	signal transduction	6	0.1	0.046	0.31
GOTERM_BP_DIRECT	regulation of smooth muscle contraction	5	0.1	1.3e-08	1.6e-06
GOTERM_BP_DIRECT	positive regulation of smooth muscle contraction	5	0.1	4.2e-08	3.2e-06
GOTERM_BP_DIRECT	ion transmembrane transport	5	0.1	0.00044	0.0088
GOTERM_BP_DIRECT	regulation of vasoconstriction	4	0.1	5.2e-06	0.00028
GOTERM_BP_DIRECT	gamma-aminobutyric acid signaling pathway	4	0.1	7e-06	0.00033
GOTERM_BP_DIRECT	adenylate cyclase-modulating G-protein coupled receptor signaling pathway	4	0.1	3.5e-05	0.0012
GOTERM_BP_DIRECT	memory	4	0.1	0.00016	0.0041
GOTERM_BP_DIRECT	phospholipase C-activating G-protein coupled receptor signaling pathway	4	0.1	0.0002	0.0047
GOTERM_BP_DIRECT	chloride transmembrane transport	4	0.1	0.00054	0.0097
GOTERM_BP_DIRECT	chemical synaptic transmission	4	0.1	0.008	0.1
GOTERM_BP_DIRECT	transport	4	0.1	0.022	0.19
GOTERM_BP_DIRECT	cell proliferation	4	0.1	0.025	0.2
GOTERM_BP_DIRECT	positive regulation of cell proliferation	4	0.1	0.046	0.31
GOTERM_BP_DIRECT	oxidation-reduction process	4	0.1	0.081	0.44
Category	Term	Count	%	P-Value	Benjamini
GOTERM_MF_DIRECT	drug binding	6	0.1	1.8e-07	1.1e-05
GOTERM_MF_DIRECT	protein heterodimerization activity	6	0.1	0.0011	0.014
GOTERM_MF_DIRECT	protein homodimerization activity	6	0.1	0.0075	0.08
GOTERM_MF_DIRECT	epinephrine binding	5	0.1	1.1e-10	1.3e-08
GOTERM_MF_DIRECT	GABA-A receptor activity	4	0.1	4.3e-06	0.00018
GOTERM_MF_DIRECT	extracellular ligand-gated ion channel activity	4	0.1	2.4e-05	0.00049
GOTERM_MF_DIRECT	alpha1-adrenergic receptor activity	3	0.1	8.5e-06	0.00026
GOTERM_MF_DIRECT	alpha2-adrenergic receptor activity	3	0.1	8.5e-06	0.00026
GOTERM_MF_DIRECT	norepinephrine binding	3	0.1	1.7e-05	0.00042
GOTERM_MF_DIRECT	benzodiazepine receptor activity	3	0.1	4.3e-05	0.00074
GOTERM_MF_DIRECT	monoamine transmembrane transporter activity	3	0.1	6e-05	0.00091
GOTERM_MF_DIRECT	G-protein coupled acetylcholine receptor activity	3	0.1	6e-05	0.00091
